# Supplementary material for: Whole-Genome Analysis of Influenza A(H3N2) and B/Victoria Viruses Detected in Myanmar during the COVID-19 Pandemic in 2021
Source: MDPI journal article supplement (doi:10.3390/v15020583), 2023-02-20
Supplement: s1 [file s1]

Table S1. Strain names and accession numbers of eight segments of influenza A(H3N2) and B/Victoria viruses collected in Myanmar in 2021, sequenced during this study, and deposited in GISAID.

| Strain name           | ID               | PB2        | PB1        | PA         | HA         | NP         | NA         | MP         | NS         |
|-----------------------|------------------|------------|------------|------------|------------|------------|------------|------------|------------|
| A/Myanmar/21M003/2021 | EPI_ISL_13614323 | EPI2082798 | EPI2082799 | EPI2082800 | EPI2082801 | EPI2082802 | EPI2082803 | EPI2082804 | EPI2082805 |
| A/Myanmar/21M004/2021 | EPI_ISL_13614361 | EPI2082806 | EPI2082807 | EPI2082808 | EPI2082809 | EPI2082810 | EPI2082811 | EPI2082812 | EPI2082813 |
| A/Myanmar/21M007/2021 | EPI_ISL_13631518 | EPI2082943 | EPI2082944 | EPI2082945 | EPI2082946 | EPI2082947 | EPI2082948 | EPI2082949 | EPI2082950 |
| A/Myanmar/21M008/2021 | EPI_ISL_13631519 | EPI2082951 | EPI2082952 | EPI2082953 | EPI2082954 | EPI2082955 | EPI2082956 | EPI2082957 | EPI2082958 |
| A/Myanmar/21M009/2021 | EPI_ISL_13631520 | EPI2082959 | EPI2082960 | failed     | EPI2082961 | EPI2082962 | EPI2082963 | EPI2082964 | EPI2082965 |
| A/Myanmar/21M013/2021 | EPI_ISL_13631521 | EPI2082966 | EPI2082967 | EPI2082968 | EPI2082969 | EPI2082970 | EPI2082971 | EPI2082972 | EPI2082973 |
| A/Myanmar/21M014/2021 | EPI_ISL_13631522 | EPI2082974 | EPI2082975 | EPI2082976 | EPI2082977 | EPI2082978 | EPI2082979 | EPI2082980 | EPI2082981 |
| A/Myanmar/21M017/2021 | EPI_ISL_13631686 | EPI2082982 | EPI2082983 | EPI2082984 | EPI2082985 | EPI2082986 | EPI2082987 | EPI2082988 | EPI2082989 |
| A/Myanmar/21M022/2021 | EPI_ISL_13631687 | EPI2082990 | EPI2082991 | EPI2082992 | EPI2082993 | EPI2082994 | EPI2082995 | EPI2082996 | EPI2082997 |
| A/Myanmar/21M073/2021 | EPI_ISL_13631776 | EPI2082998 | EPI2082999 | EPI2083000 | EPI2083001 | EPI2083002 | EPI2083003 | EPI2083004 | EPI2083005 |
| A/Myanmar/21M142/2021 | EPI_ISL_13631777 | EPI2083006 | EPI2083007 | EPI2083008 | EPI2083009 | EPI2083010 | EPI2083011 | EPI2083012 | EPI2083013 |
| A/Myanmar/21M143/2021 | EPI_ISL_13631778 | EPI2083014 | EPI2083015 | EPI2083016 | EPI2083017 | EPI2083018 | EPI2083019 | EPI2083020 | EPI2083021 |
| A/Myanmar/21M144/2021 | EPI_ISL_13631779 | EPI2083022 | EPI2083023 | EPI2083024 | EPI2083025 | EPI2083026 | EPI2083027 | EPI2083028 | EPI2083029 |
| B/Myanmar/21M015/2021 | EPI_ISL_13631828 | EPI2083031 | EPI2083032 | EPI2083030 | EPI2083033 | EPI2083034 | EPI2083035 | EPI2083036 | EPI2083037 |
| B/Myanmar/21M023/2021 | EPI_ISL_13631829 | EPI2083038 | EPI2083039 | EPI2083040 | EPI2083041 | EPI2083042 | EPI2083043 | EPI2083044 | EPI2083045 |
| B/Myanmar/21M024/2021 | EPI_ISL_13632067 | failed     | failed     | failed     | EPI2083046 | EPI2083047 | EPI2083048 | EPI2083049 | EPI2083050 |

Abbreviations: PB2, polymerase basic 2; PB1, polymerase basic 1; PA, polymerase acid; HA, hemagglutinin; NP, nucleocapsid protein; NA, neuraminidase; MP, matrix protein; NS, nonstructural protein.

Table S2. Common amino acid substitutions in seven segments of A(H3N2) viruses collected in Myanmar 2021 and compared with those of the SH 2021 vaccine strains A/Hong Kong/45/2019.

| Amino acid substitutions |             |     |     |     |     |     |     |     |     |     |     |     |     |     |     |     |     |     |     |     |  |
|--------------------------|-------------|-----|-----|-----|-----|-----|-----|-----|-----|-----|-----|-----|-----|-----|-----|-----|-----|-----|-----|-----|--|
|                          | Segment     | PB2 |     |     |     |     |     |     | PB1 |     |     |     |     |     |     | PA  |     |     | NP  |     |  |
| Vaccine strain           | Clade       | 112 | 415 | 449 | 314 | 400 | 561 | 571 | 587 | 603 | 618 | 619 | 692 | 321 | 402 | 626 | 136 | 220 | 418 | 500 |  |
| A/Hong Kong/45/2019      | 3C.2a.1b.1b | N   | M   | I   | S   | A   | D   | R   | G   | G   | M   | R   | S   | Y   | S   | R   | I   | E   | L   | G   |  |
| Myanmar viruses 2021     | 2a.3        | D   | V   | V   | N   | E   | G   | Q   | R   | E   | T   | I   | N   | C   | T   | K   | M   | D   | I   | E   |  |
|                          | Segment     | NA  |     |     |     |     |     |     | MP  |     |     |     |     |     |     | NS  |     |     |     |     |  |
| Vaccine strain           | Clade       | 45  | 54  | 315 | 329 | 344 | 346 | 463 | 465 | 271 | 285 | 298 | 299 | 135 | 211 | 218 | 241 |     |     |     |  |
| A/Hong Kong/45/2019      | 3C.2a.1b.1b | L   | E   | S   | S   | E   | G   | D   | N   | V   | P   | S   | T   | R   | N   | P   | N   |     |     |     |  |
| Myanmar viruses 2021     | 2a.3        | P   | G   | R   | N   | K   | D   | N   | S   | M   | L   | C   | A   | K   | H   | L   | D   |     |     |     |  |

Abbreviations: SH, Southern Hemisphere; PB2, polymerase basic 2; PB1, polymerase basic 1; PA, polymerase acid; NP, nucleoprotein; NA, neuraminidase; MP, matrix protein; NS, nonstructural protein.

Table S3. Common amino acid substitutions in seven segments of A(H3N2) viruses collected in Myanmar 2021 and compared with those of the SH 2022 vaccine strains A/Darwin/6/2021.

|                      |         | Amino acid substitutions |     |     |    |     |     |     |     |    |     |     |     |     |
|----------------------|---------|--------------------------|-----|-----|----|-----|-----|-----|-----|----|-----|-----|-----|-----|
|                      | Segment | PB1                      |     |     |    |     | PA  |     |     | NA |     |     | MP  |     |
| Vaccine strain       | Clade   | 376                      | 583 | 619 | 99 | 321 | 402 | 407 | 660 | 54 | 329 | 288 | 298 | 325 |
| A/Darwin/6/2021      | 2a      | T                        | R   | T   | E  | Y   | A   | V   | S   | E  | S   | H   | T   | V   |
| Myanmar viruses 2021 | 2a.3    | A                        | K   | I   | G  | C   | T   | I   | A   | G  | N   | P   | A   | I   |

Abbreviations: SH, Southern Hemisphere; PB2, polymerase basic 2; PB1, polymerase basic 1; PA, polymerase acid; NP, nucleoprotein; NA, neuraminidase; MP, matrix protein; NS, nonstructural protein.

Table S4. Common amino acid substitutions in seven segments of B/Victoria viruses collected in Myanmar 2021 and compared with those of the SH 2021 vaccine strains B/Washington/02/2019.

| Amino acid substitutions |          |     |     |     |     |     |     |     |     |     |     |    |    |     |     |     |     |     |     |     |
|--------------------------|----------|-----|-----|-----|-----|-----|-----|-----|-----|-----|-----|----|----|-----|-----|-----|-----|-----|-----|-----|
|                          | Segment  | PB2 | PB1 |     |     |     | PA  |     |     | NP  |     |    |    | NA  |     |     |     |     |     |     |
| Vaccine strain           | Clade    | 56  | 375 | 454 | 272 | 312 | 613 | 709 | 549 | 550 | 551 | 42 | 71 | 344 | 345 | 396 | 402 | 465 | 470 | 484 |
| B/Washington/02/2019     | V1A.3    | S   | S   | N   | H   | K   | K   | F   | R   | D   | T   | P  | V  | Q   | R   | N   | G   | H   | E   | V   |
| Myanmar viruses 2021     | V1A.3a.2 | N   | G   | D   | Y   | R   | R   | V   | G   | S   | R   | Q  | A  | R   | G   | S   | D   | Y   | G   | I   |
|                          | Segment  | MP  |     |     |     |     | NS  |     |     |     |     |    |    |     |     |     |     |     |     |     |
| Vaccine strain           | Clade    | 15  | 285 | 306 | 362 | 378 | 130 | 306 | 311 | 312 |     |    |    |     |     |     |     |     |     |     |
| B/Washington/02/2019     | V1A.3    | T   | I   | D   | F   | V   | L   | N   | L   | H   |     |    |    |     |     |     |     |     |     |     |
| Myanmar viruses 2021     | V1A.3a.2 | I   | T   | G   | S   | A   | F   | S   | P   | N   |     |    |    |     |     |     |     |     |     |     |

Abbreviations: SH, Southern Hemisphere; PB2, polymerase basic 2; PB1, polymerase basic 1; PA, polymerase acid; NP, nucleoprotein; NA, neuraminidase; MP, matrix protein; NS, nonstructural protein.

Table S5. Common amino acid substitutions in seven segments of B/Victoria viruses collected in Myanmar 2021 and compared with those of the SH 2022 vaccine strains B/Austria/1359417/2021.

| Amino acid substitutions |          |     |     |     |     |     |     |    |     |     |     |     |     |
|--------------------------|----------|-----|-----|-----|-----|-----|-----|----|-----|-----|-----|-----|-----|
|                          | Segment  | PB2 | PB1 |     |     | PA  |     |    | NP  |     | NA  |     | NS  |
| Vaccine strain           | Clade    | 396 | 51  | 375 | 272 | 376 | 613 | 28 | 550 | 551 | 455 | 460 | 312 |
| B/Austria/1359417/2021   | V1A.3a.2 | I   | D   | S   | H   | I   | K   | A  | D   | T   | V   | Y   | H   |
| Myanmar viruses 2021     | V1A.3a.2 | M   | N   | G   | Y   | M   | R   | T  | S   | R   | A   | C   | N   |

Abbreviations: SH, Southern Hemisphere; PB2, polymerase basic 2; PB1, polymerase basic 1; PA, polymerase acid; NP, nucleoprotein; NA, neuraminidase; MP, matrix protein; NS, nonstructural protein.
