# Supplementary figures and images for: Whole-Genome Analysis of Influenza A(H3N2) and B/Victoria Viruses Detected in Myanmar during the COVID-19 Pandemic in 2021
Source: MDPI journal article supplement (doi:10.3390/v15020583), 2023-02-20

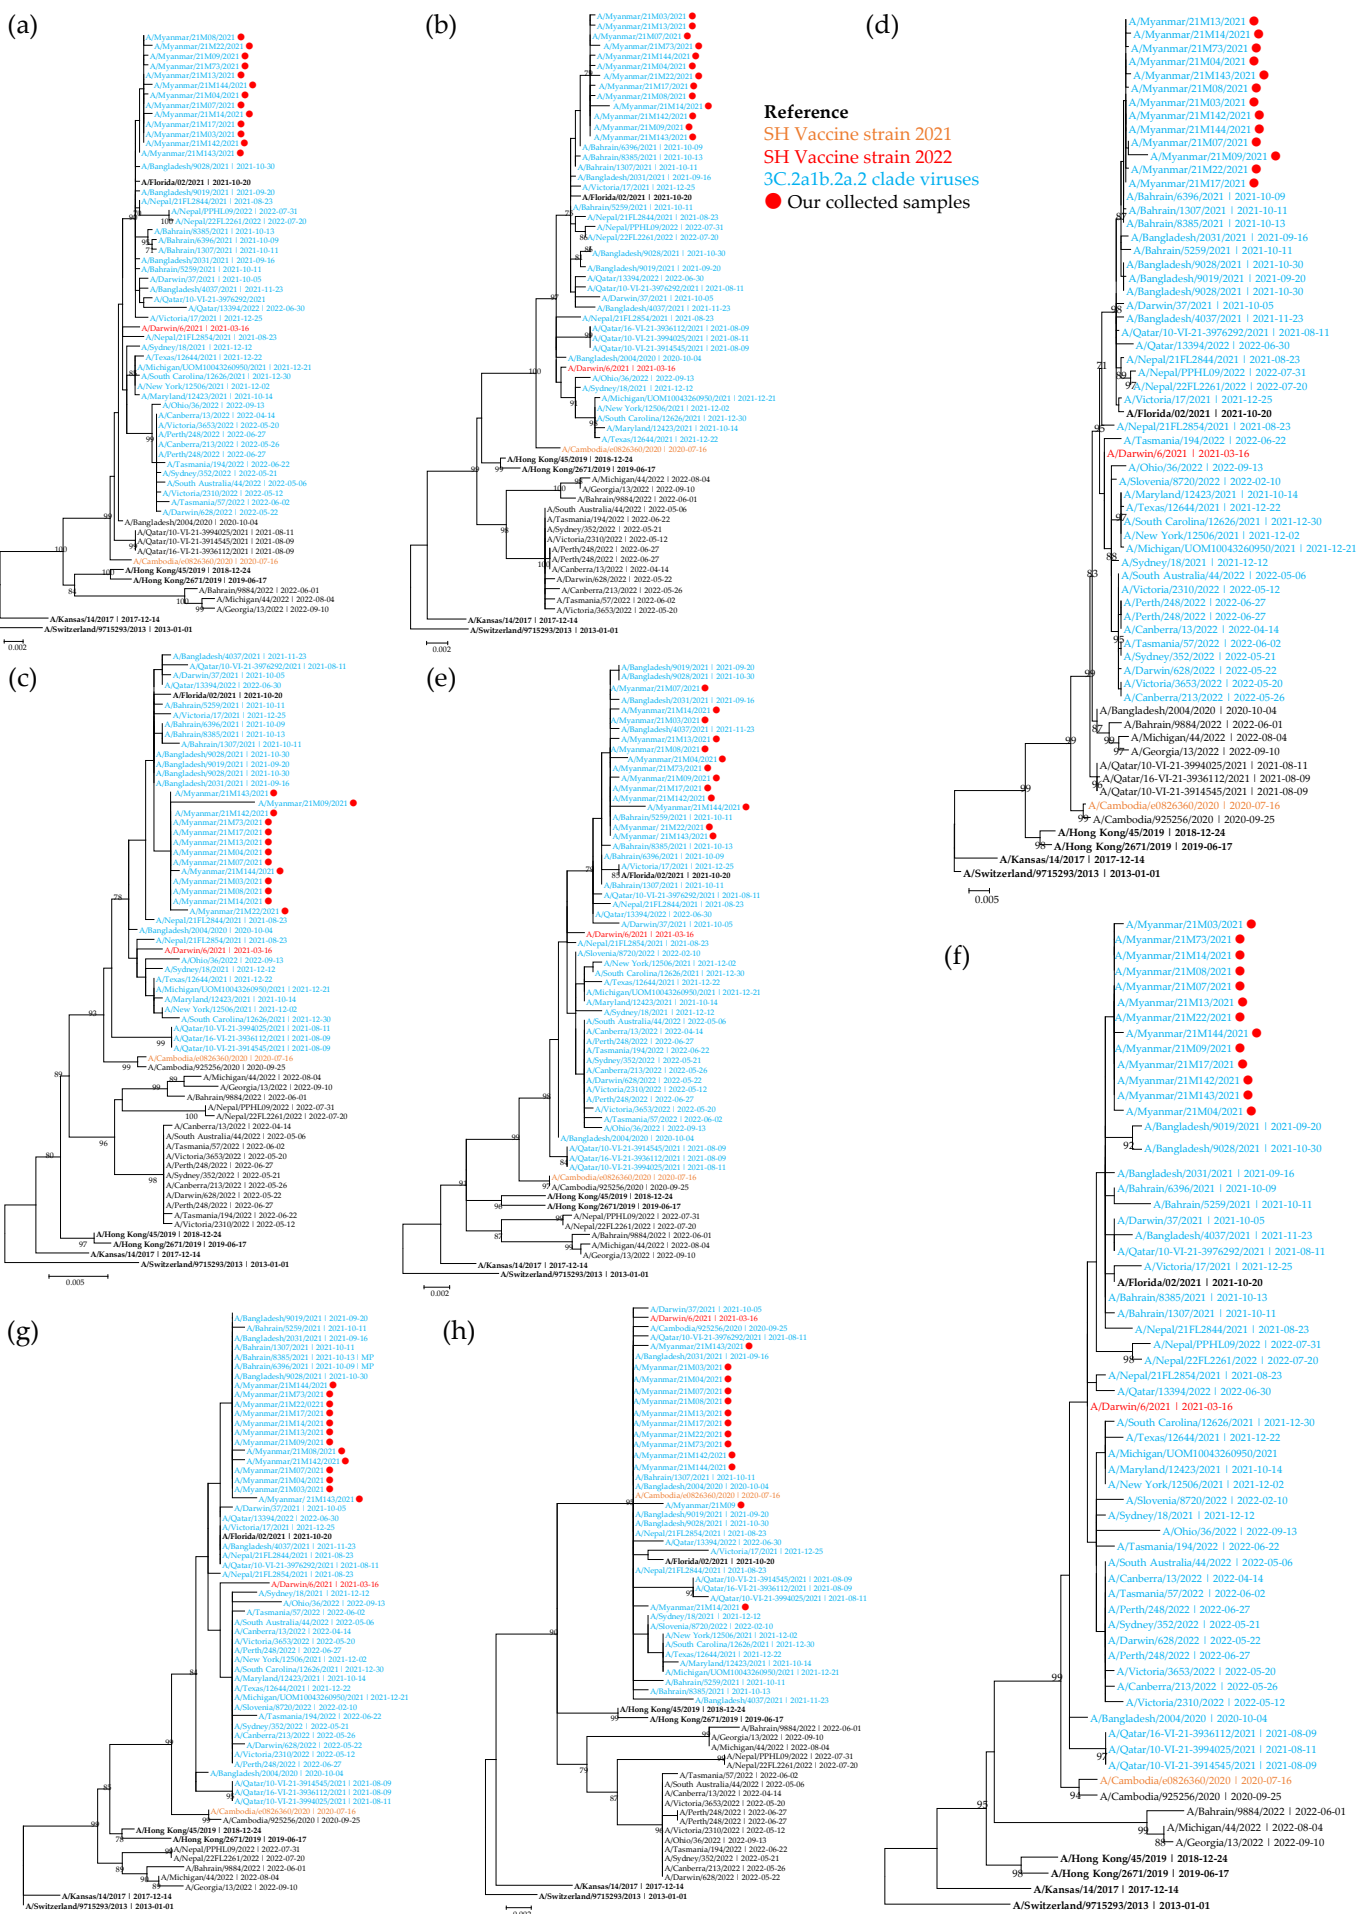

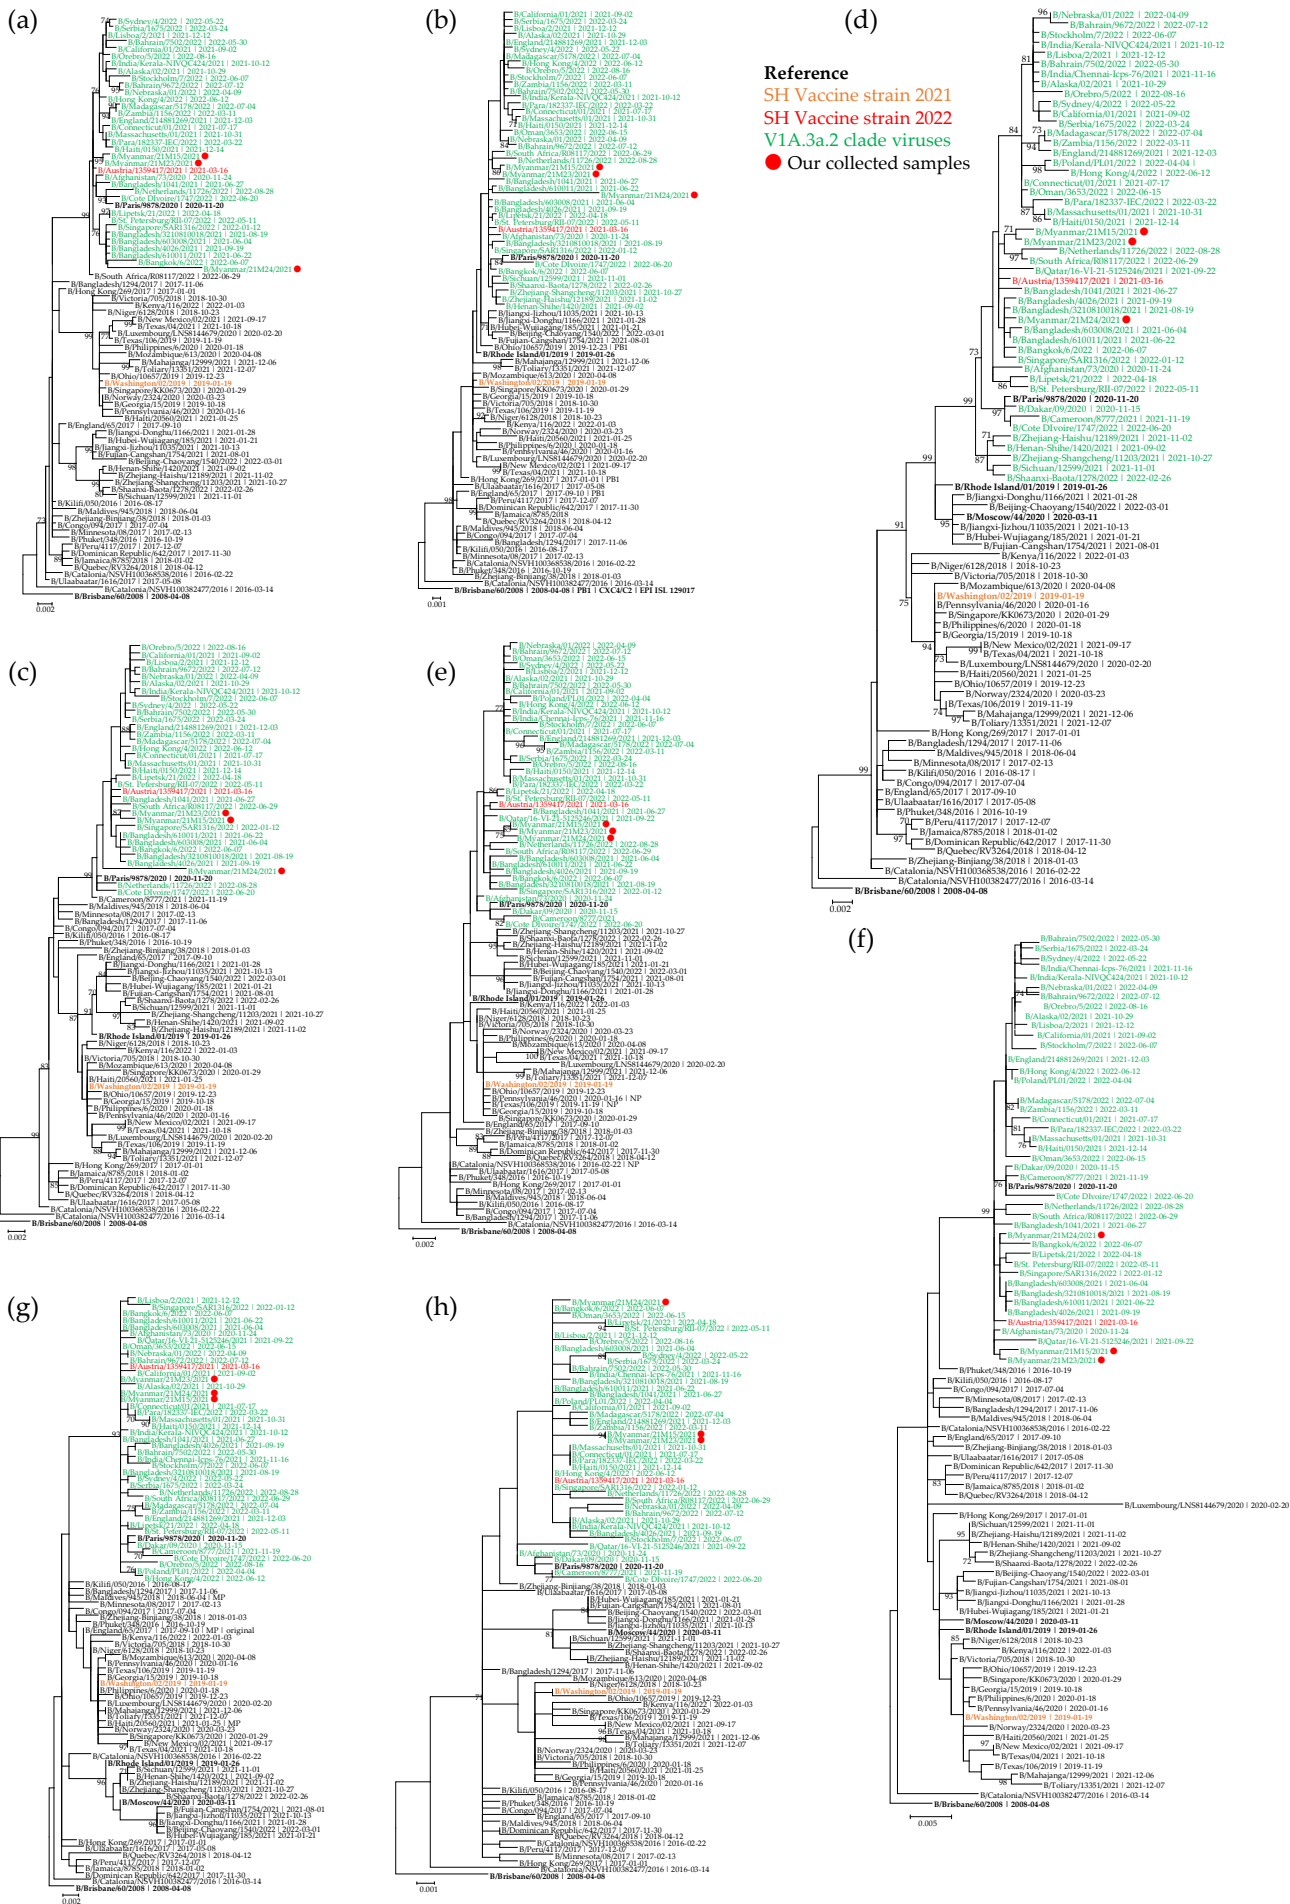

Supplement: s1 [file s1]
